# Supplementary material
Source: publisher site journal article supplement (https://www.dovepress.com/article/268025)
Supplement: Supplementary file 1 [file get_supplementary_file.php]

**Supplementary material**

**Table S1: The correlation between expression of Hepsin and clinicopathological indicators of PC patients [n]**

| Clinicopathologic feature | | n | Hepsin expression | | Z | *P* |
| --- | --- | --- | --- | --- | --- | --- |
| Low | High |
| Age |  | |  |  |  |  |
| ＜60 | 15 | | 6 | 9 |  |  |
| ≥60 | 11 | | 5 | 6 | 0.278 | 0.781 |
| Gleason score |  | |  |  |  |  |
| 3-6 | 17 | | 7 | 10 |  |  |
| 7-10 | 9 | | 3 | 6 | 0.391 | 0.696 |
| Clinical stage |  | |  |  |  |  |
| Ⅰ-Ⅱ | 14 | | 5 | 9 |  |  |
| Ⅲ-Ⅳ | 12 | | 6 | 6 | 0.462 | 0.735 |
| Lymph node metastasis |  | |  |  |  |  |
| No | 12 | | 7 | 5 |  |  |
| Yes | 14 | | 6 | 8 | 0.787 | 0.431 |
